# Supplementary material for: Ultrahigh discharge efficiency and energy density achieved at low electric fields in sandwich-structured polymer films containing dielectric elastomers
Source: Royal Society of Chemistry journal article supplement (doi:10.1039/c8ta11790j), 2019-01-01
Supplement: c8ta11790j1.pdf [file c8ta11790j1.pdf]

## Electronic Supplementary Information

### **Ultrahigh discharge efficiency and energy density at a low electric field of sandwich-structured polymer films containing dielectric elastomers**

Jie Chen,<sup>a</sup> Yifei Wang,<sup>b</sup> Xinwei Xu,<sup>a</sup> Qibin Yuan,<sup>a</sup> Yujuan Niu,<sup>c</sup> Qing Wang,<sup>d</sup> and  
Hong Wang<sup>\*ac</sup>

<sup>a</sup> School of Electronic and Information Engineering & State Key Laboratory for Mechanical Behavior of Materials, Xi'an Jiaotong University, Xi'an 710049, China.

<sup>b</sup> Electrical Insulation Research Center, Institute of Materials Science, University of Connecticut, Storrs, Connecticut, 06269, USA.

<sup>c</sup> Department of Materials Science and Engineering, Southern University of Science and Technology, Shenzhen 518055, China.

<sup>d</sup> Department of Materials Science and Engineering, The Pennsylvania State University, University Park, Pennsylvania, 16802, USA.

\* E-mail: wangh6@sustc.edu.cn

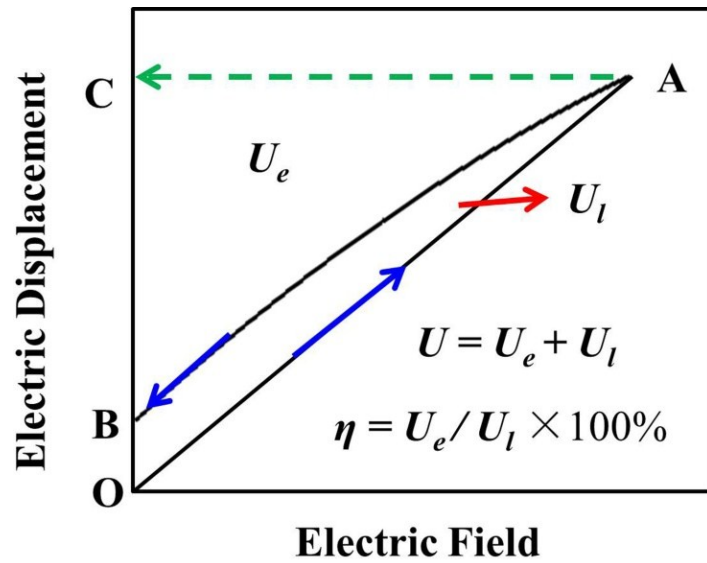

**Fig. S1.** Schematic  $D$ - $E$  loop of a dielectric material, where the charged (total) energy density ( $U$ ) is derived from the  $D$ - $E$  loop by integration of the area between the charge curve and the ordinate, the discharged energy density ( $U_e$ ) is determined by the area between the discharge curve and the ordinate, and efficiency ( $\eta$ ) is the ratio of  $U_e$  and  $U$ .

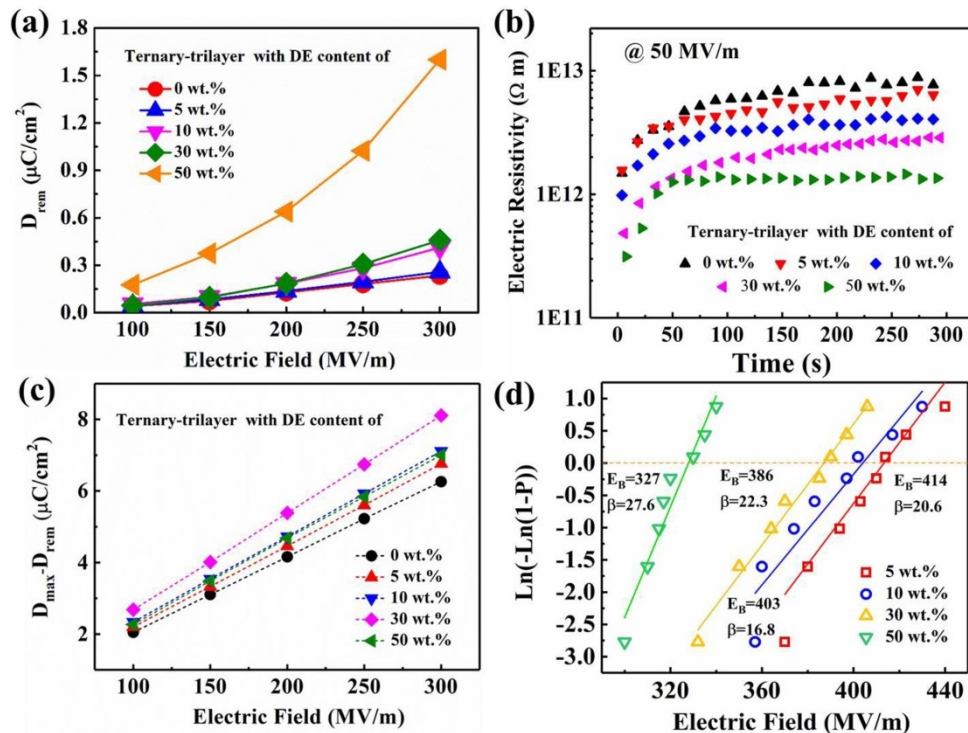

**Fig. S2.** (a) Remnant displacement. (b) Electrical resistivity. (c) Electrical displacement difference as a function of the applied field. (d) Weibull distribution and the characteristic breakdown strength of the ternary-trilayered films.

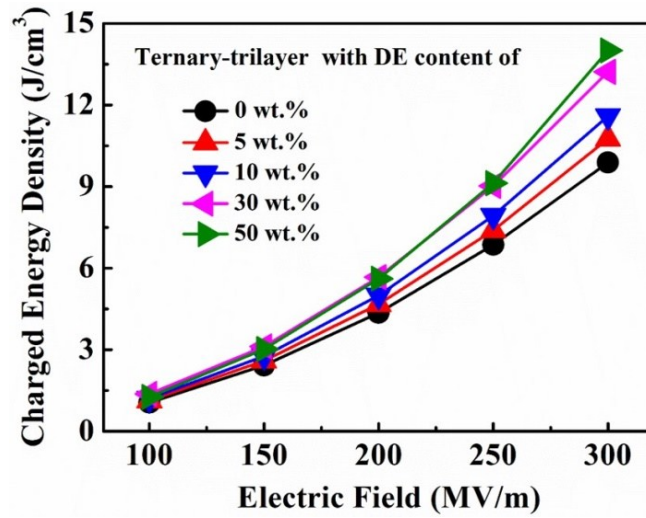

**Fig. S3.** Charged energy density of ternary-trilayer architecture films as a function of the applied field.

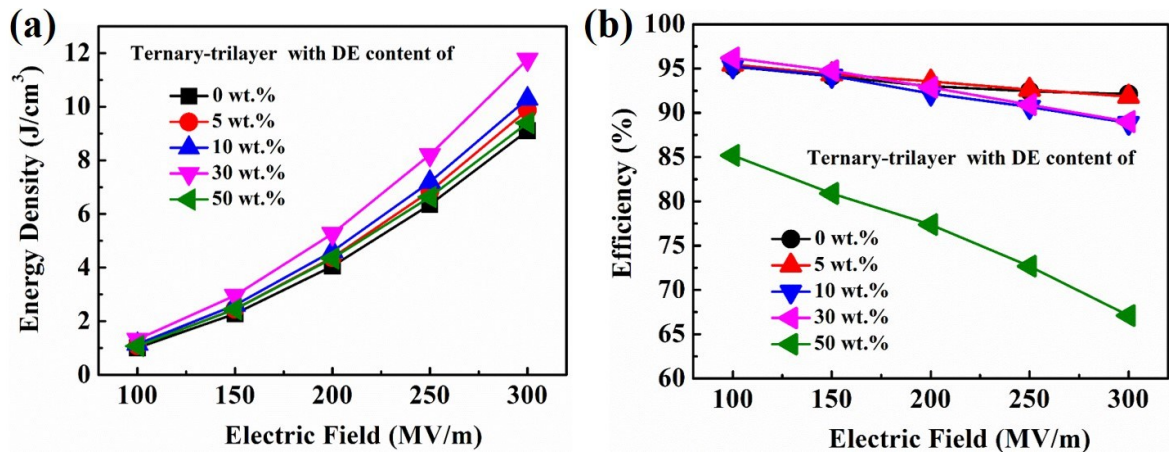

**Fig. S4.** (a) Discharged energy density and (b) efficiency of ternary-trilayer architecture films as a function of the applied field.

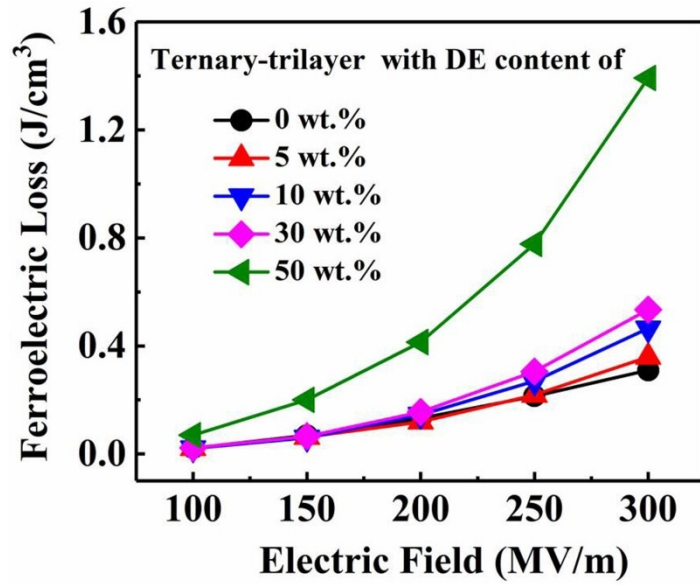

**Fig. S5.** Ferroelectric loss at varied electric fields of ternary tri-layered architecture films at different loadings.

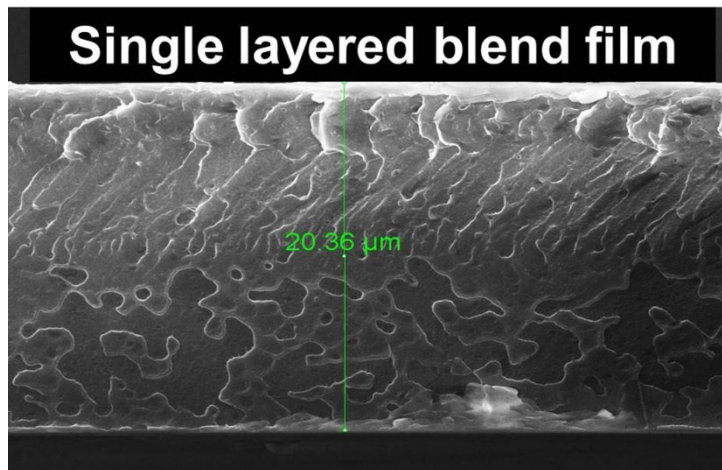

**Fig. S6.** Cross-section SEM morphology of single layered blend film.

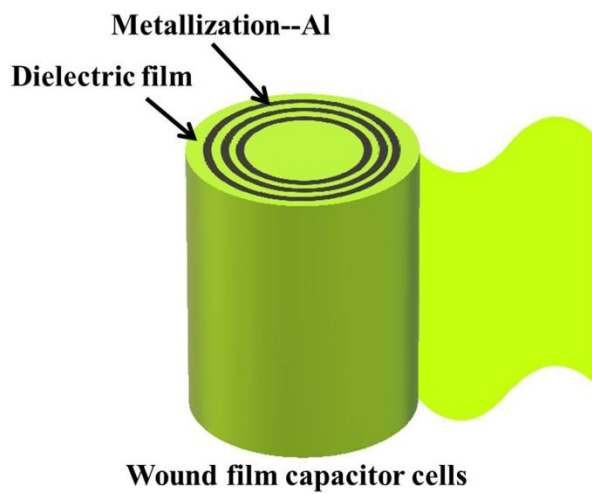

**Fig. S7.** Schematic illustration of a real wound film capacitor.

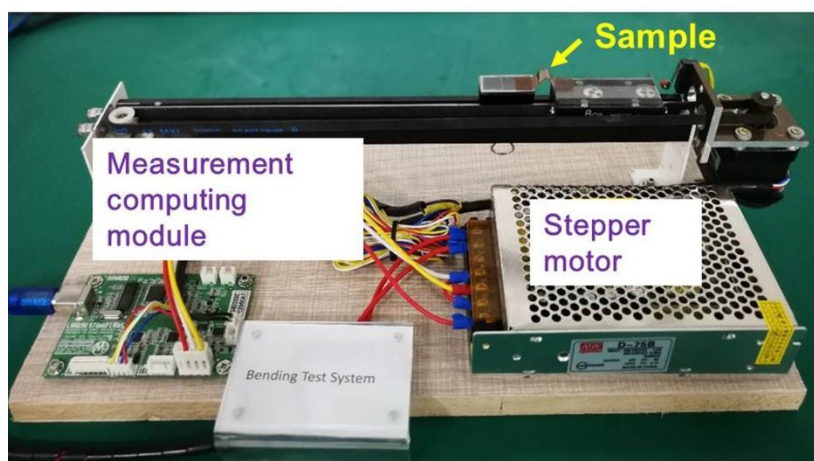

**Fig. S8.** Digital photographs of experimental setup of the bending test.

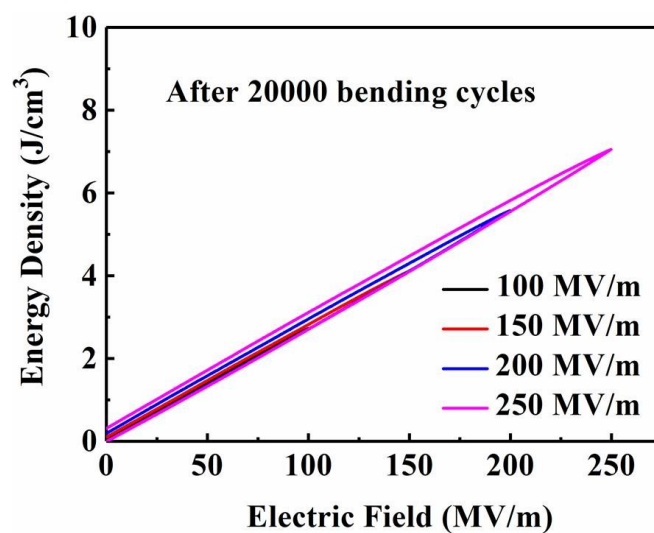

**Fig. S9.** D-E loops at varied electric fields of ternary-trilayer architecture film after bending tests.
